# Supplementary material for: Collaborative Care for Low-Income Patients From Racial-Ethnic Minority Groups in Primary Care: Engagement and Clinical Outcomes
Source: Atypon-hosted journal article supplement (doi:10.1176/appi.ps.202000924), 2022-02-10
Supplement: appi.ps.202000924.ds001.pdf [file appi.ps.202000924.ds001.pdf]

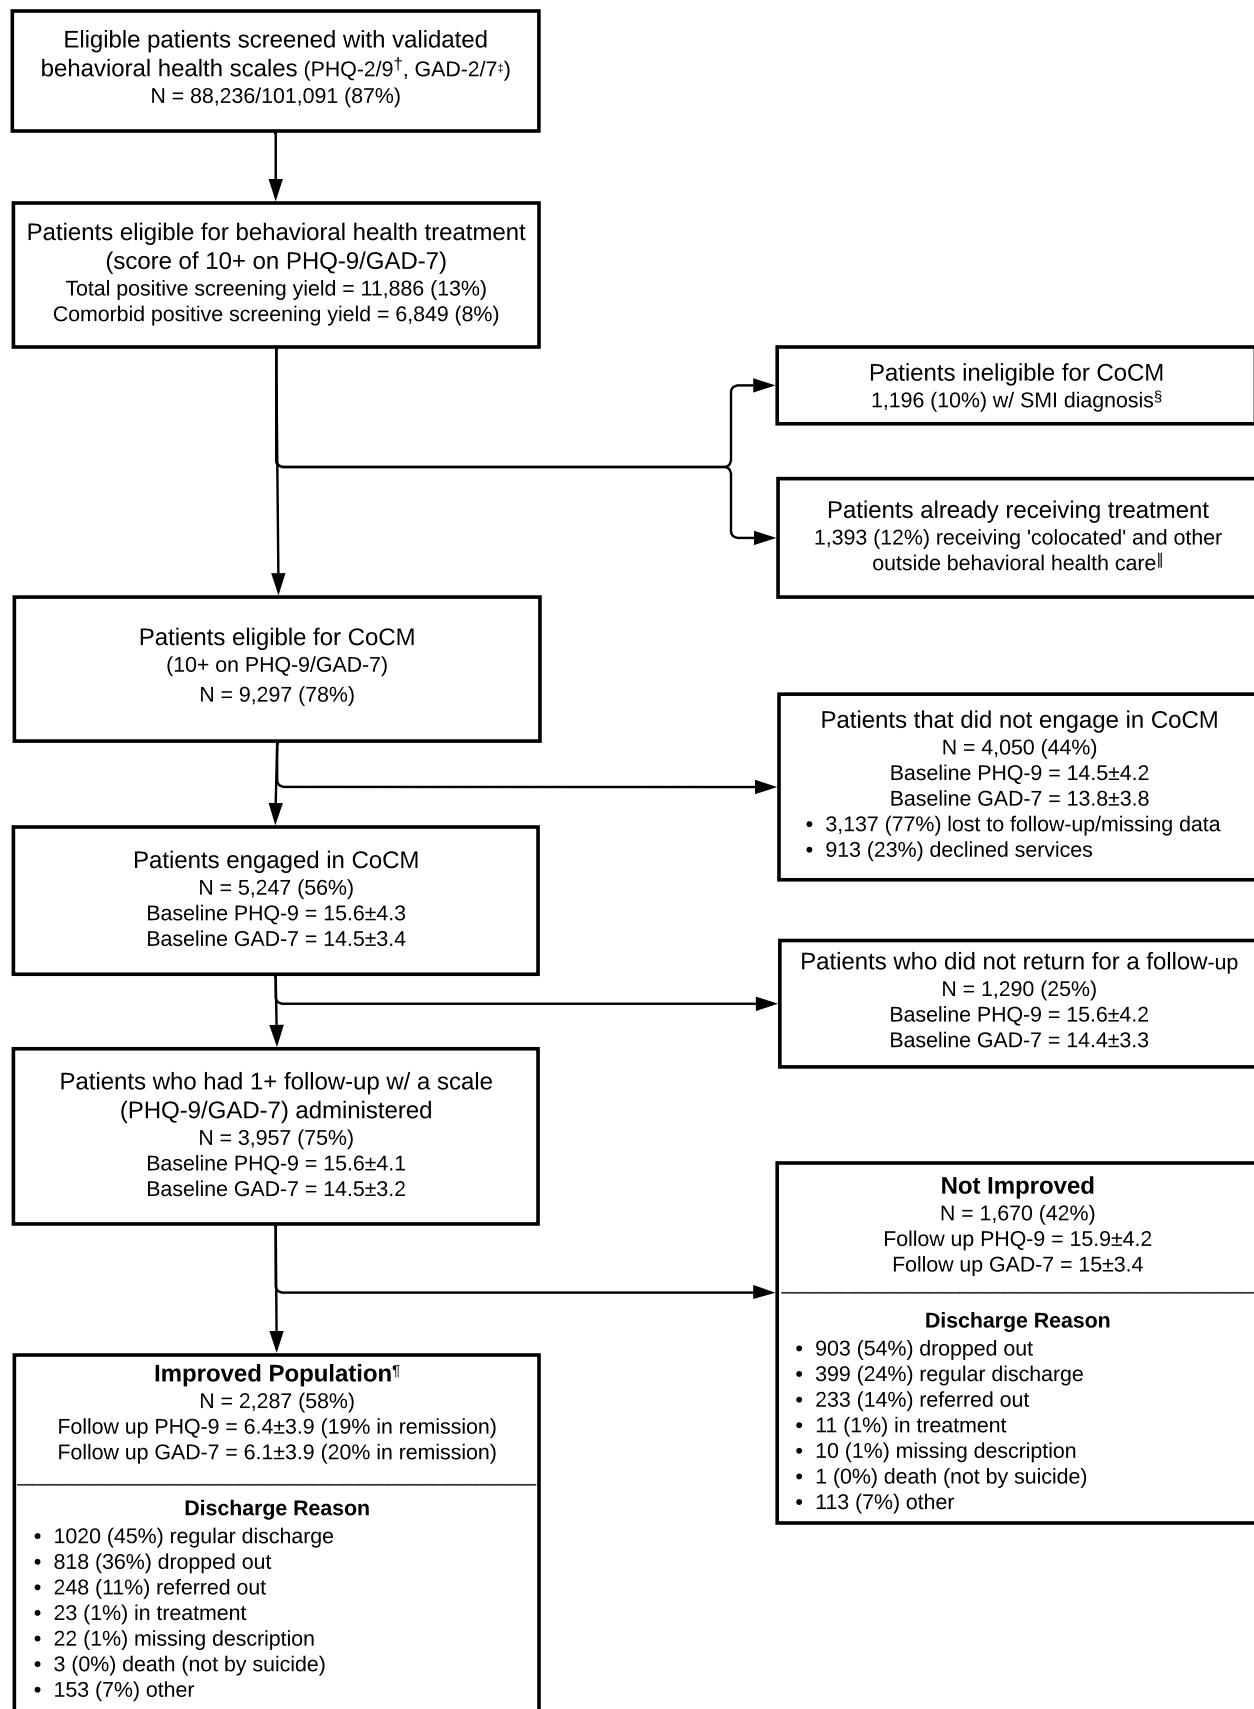

Figure. Collaborative care model (CoCM) impact: Screening rate and yield, engagement, and clinical outcomes.

† PHQ-2/9 = Patient Health Questionnaire-2/9; screen for presence and severity of depressive symptoms

‡ GAD-2/7 = General Anxiety Disorder-2/7; screen for presence and severity of anxiety symptoms

§ Includes bipolar, schizophrenia, and dementia diagnoses; psychotic symptoms; and cognitive impairment

¶ Patients with a positive PHQ-9/GAD-7 and 2+ visits with a behavioral health provider at primary care clinic. Excluded everyone who was ever engaged in the collaborative care model (ever engaged N = 5,247).

¶¶ Improvement is defined by a 50% decrease from baseline score or a score less than 10 on the PHQ-9 and/or GAD-7 at 10-14 week follow-up (used modified intent-to-treat analysis). Patient scored positive on either or both scales at baseline.
